## List of referees

The Editors take this opportunity to thank the following referees (reviewers) for their prompt, thoughtful, and constructive reports.

|                                   |                            |                         |
|-----------------------------------|----------------------------|-------------------------|
| Sondre Aanes                      | Phil Boulcott              | Steven Cooke            |
| Geert Aarts                       | Richard Braley             | Susan Cormier           |
| Francisco Abascal                 | Andy Brand                 | John Cotter             |
| Pablo Abaunza                     | Willem Brandenburg         | Mark Coulson            |
| Ann-Lisbet Agnalt                 | Keith Brander              | Paul Cowley             |
| Sveinn Agnarsson                  | John Bratthey              | Anthony Cox             |
| Cameron Ainsworth                 | Patrice Brehmer            | Johan Craeymeersch      |
| Amaya Albalat                     | Claudia S. Bremec          | Kevin Craig             |
| Vitor Almada                      | Paul Brickle               | Enrique Alberto Crespo  |
| Tiago Almudi                      | Ian R. Bricknell           | Katherine Curtis        |
| Ken Haste Andersen                | Richard Briggs             | Philippe Cury           |
| John T. Anderson                  | Richard Brill              | Giovanni D'Anna         |
| Allen Andrews                     | Robert Brock               | Valérie David           |
| Dror Angel                        | Elizabeth N. Brooks        | Sarah Davies            |
| Alexander Arkhipkin               | Jeffrey Buckel             | Michael W. Davis        |
| Ragnar Arnason                    | Lene Buhl-Mortensen        | Gail Davoren            |
| Eero Aro                          | Paal Buhl-Mortensen        | Earl Dawe               |
| Francisco (Paco) Arreguín-Sánchez | Alida Bundy                | Robert W. Day           |
| Frank Asche                       | Anukul Buranapratheprat    | Carryn de Moor          |
| Mårten Åström                     | Julian Burgos              | Markus Deising          |
| Jay Barlow                        | Artur Burzynski            | Alyne E. Delaney        |
| Sebastian Barot                   | Morgan Scott Busby         | David A. Demer          |
| Rob Barrett                       | Henrique Cabral            | Tim Dempster            |
| Ann M. Barse                      | Noel Cadigan               | Roy Deng                |
| Inka Bartsch                      | Steve Cadrin               | Jonathan J. Deroba      |
| Nicolas J. Bax                    | Gregor Cailliet            | Orest Diachok           |
| William Bayliff                   | Dale R. Calder             | Cathy M. Dichmont       |
| Jonathan Beacham                  | Ruth Callaway              | Gerard DiNardo          |
| Doug Beare                        | Marnie L. Campbell         | Rosario Domínguez Petit |
| Giovanni Bearzi                   | Neil Campbell              | Mike Donaldson          |
| Andrea Belgrano                   | Massimiliano Cardinale     | Mary Donohue            |
| Ewen Bell                         | Rita Castilho              | Mathieu Pierre Doray    |
| Kelly Benoit-Bird                 | Martin Castonguay          | Konstantin Drevetnyak   |
| Olof Berglund                     | Luca Ceriola               | Ken Drouillard          |
| Melanie Bergmann                  | Gregoire Certain           | Hilaire Drouineau       |
| Miguel Bernal                     | Santiago Cerviño           | Rafael Duarte           |
| Giacomo Bernardi                  | Peter Chapman              | Robert DuBois           |
| Theresa M. Bert                   | Emmanuel Charles-Dominique | Nicholas K. Dulvy       |
| Michel Bertignac                  | Brandon Chasco             | Adam Dunford            |
| Arnaud Bertrand                   | William Cheung             | Daniel Duplisea         |
| Sophie Bertrand                   | John H. Choat              | Jan Ekebom              |
| Malcolm Beveridge                 | Dezhang Chu                | Jaakko Erkinaro         |
| Nicolas Bez                       | David Claessen             | Karim Erzini            |
| Gabriella Bianchi                 | Maurice Clarke             | Geoff Evans             |
| Stijn Bierman                     | Annika Jane Clements       | J. Paige Eveson         |
| Janet Bishop                      | Kendall Clements           | Mary Fabrizio           |
| Paolo Bisol                       | Jean-Claude Cochard        | Sascha Faessler         |
| Arne Bjørge                       | Edward Codling             | Keith Farnsworth        |
| F. Guillaume Blanchet             | Janet Coetzee              | Carmen Fernández        |
| Stefan Bolam                      | Roger Coggan               | Frank Ferrari           |
| Angel Borja                       | Jeremy S. Collie           | Jonathan Fisher         |
| Louis Botsford                    | Robin Cook                 | Arne Fjälling           |
| David Boukal                      | Justin Cooke               | Warrick Fletcher        |

Jens Floeter  
 Kenneth Foote  
 Robyn Forrest  
 Clive Fox  
 Malcolm Francis  
 Rikke Petri Frandsen  
 Helen Fraser  
 Chris L. J. Frid  
 Kevin Friedland  
 Marjorie A. M. Friedrichs  
 Jean-Marc Fromentin  
 Hans Frost  
 Rob Fryer  
 Elizabeth A. Fulton  
 Masahiko Furusawa  
 Pedro Manuel Galetti Jr.  
 Dorleta Garcia  
 Mariano Garcia-Rodriguez  
 Miguel Gaspar  
 Todd Gedamke  
 Fiona Gell  
 Wendy Gentleman  
 Nate Gerald  
 François Gerlotto  
 Darren Gillis  
 Henrik Gislason  
 Frank Gobas  
 Brendan Godley  
 Kenneth J. Goldman  
 Daniel Gomez-Uchida  
 Andy Goodwin  
 Leonel Serrano Gordo  
 Ana Gordo  
 Norman Graham  
 W. Stewart Grant  
 Marie-Ange Gravel  
 Simon Greenstreet  
 Anthony Grehan  
 Angel Guerra  
 Vince Guida  
 Nicolas Gutierrez  
 Olivier Guyader  
 Malcolm Haddon  
 Ralph Halliday  
 Cornelius Hammer  
 Guoqi Han  
 Nils Olav Handegard  
 Reinhold Hanel  
 Lars Petter Hansen  
 Deborah Hart  
 Rick A. Hart  
 Gordon Hastie  
 Tore Haug  
 Steven J. Hawkins  
 Pingguo He  
 Henk J. L. Heessen  
 Jakob Hemmer-Hansen  
 Lisa Hendrickson  
 Louis Herman  
 Antonio Hervás  
 Thomas Hesler  
 Sheila Heymans  
 Hans Hillewaert  
 Kjetil Hindar  
 Miyuki Hirose  
 David Hirst  
 Olle Hjerne  
 Kim Holland  
 D. Van Holliday  
 Anne Hollowed  
 John Horne  
 Ed Houde  
 Penny Howell  
 Erich Hoyt  
 Sarah Hughes  
 Odd-Børre Humborstad  
 Ewan Hunter  
 Geir Huse  
 Trevor Hutton  
 Charlie Huveneers  
 Carsten Hvingel  
 Leire Ibaibarriaga  
 Taro Ichii  
 Josef Idoine  
 Ólafur Arnar Ingólfsson  
 Sachihiko Itoh  
 Shiro Itoi  
 George Jackson  
 Ernesto Jardim  
 Astrid Jarre  
 J. Michael Jech  
 Simon Jennings  
 Arne Johannessen  
 Geir Odd Johansen  
 Michael F. Jones  
 Bror Jonsson  
 Nina Jonsson  
 Klaas Kaag  
 Stein Kaartvedt  
 Michael Kaiser  
 Irma Kallio-Nyberg  
 Nick Kamenos  
 David Kaplan  
 Constantina Karlou-Riga  
 William Karp  
 Takashi Kasugai  
 Stelios Katsanevakis  
 So Kawaguchi  
 Laurence Kell  
 Alexander Kempf  
 Ellen Kenchington  
 Fred S. B. Kibenge  
 Robert Kieser  
 James Kirkley  
 Pierre Kleiber  
 Rudy Kloser  
 Frank Knudsen  
 Mariano Koen-Alonso  
 Rolf J. Korneliussen  
 Vladimir Kostylev  
 Stan Kotwicki  
 Sarah Kraak  
 Jan Kube  
 Pascal Laffaille  
 Han-Lin Lai  
 Kuldeep K. Lal  
 Yvan Lambert  
 Giancarlo Lauriano  
 Raymond Lauzier  
 Andy Lawler  
 Gilles le Moullac  
 Will le Quesne  
 Christopher M. Legault  
 Robert J. G. Lester  
 Jason Link  
 Brian Linton  
 Marek Lipiński  
 L. Richard Little  
 Jordi Lleonat  
 Joel Llopiz  
 Wen Long  
 Bruno Díaz López  
 Pascal Lorange  
 Colm Lordan  
 Torleif M. Lunde  
 Carolyn Lundquist  
 Molly Lutcavage  
 Jeremy Lyle  
 Gavin Macaulay  
 Brian R. MacKenzie  
 Ken MacKenzie  
 Sharon MacLean  
 Colin MacLeod  
 Jean-Jacques Maguire  
 Stéphanie Mahévas  
 Roger L. Mann  
 Samu Mäntyniemi  
 Paul Marchal  
 Stefano Mariani  
 Maria G. Marin  
 C. Tara Marshall  
 Karen Martien  
 Michael Maxwell  
 Francesc Maynou  
 Sam McClatchie  
 James D. McCleave  
 Megan McCusker  
 Jan McDowell  
 Iain J. McGaw  
 Phil McGinnity  
 Chris McGonigle  
 Dan McKiernan  
 Skip McKinnell  
 Bernard Megrey  
 Luiz Mello  
 Gary Melvin  
 Gui Menezes  
 Richard Merrick  
 Benoit Mesnil  
 Rick Methot  
 Elizabeth T. Methratta  
 Colin Millar  
 Russell B. Millar

|                         |                          |                            |
|-------------------------|--------------------------|----------------------------|
| Aroha Miller            | Carlo Pipitone           | Gary Sharp                 |
| Arthur J. Miller        | Roland Pitcher           | Peter Shaughnessy          |
| Timothy J. Miller       | Éva Plagányi-Lloyd       | Daniel Shimada Brotto      |
| Mihoko Minami           | Trevor Platt             | Michael F. Sigler          |
| Coilin Minto            | Guido Plaza              | Alexandra Silva            |
| Ole Arve Misund         | Jeffrey Polovina         | E. John Simmonds           |
| Christian Möllmann      | Jan Jaap Poos            | Dankert Skagen             |
| Natalie Moltschaniwskyj | John Pope                | Georg Skaret               |
| Bill Montevecchi        | Mark Powell              | Timothy Skewes             |
| Beatriz Morales-Nin     | Joseph Powers            | Morten D. Skogen           |
| Pierre Morand           | Michael Prager           | Chris Smith                |
| Elisabetta B. Morello   | Jeremy Prince            | Philip Smith               |
| M. Joanne Morgan        | James Pringle            | Stephen Smith              |
| Elizabeth Morris        | André Punt               | Jon Solmundsson            |
| Edoardo Mostarda        | Terrance Quinn           | Stylianos Somarakis        |
| Franz J. Mueter         | Timothy J. Ragen         | Christina Sommerville      |
| Christian Mullan        | Paul J. Rago             | Henrik Sparholt            |
| Stephan Munch           | Sergio Ragonese          | Dale Squires               |
| Sten Munch-Petersen     | Dave Reddin              | Gary Stauffer              |
| Hilario Murua           | Stuart Reeves            | Grant D. Stentiford        |
| Richard Nash            | Jim Reid                 | Brad Stevens               |
| Coby Needle             | Steve Reilly             | Kevin Stokesbury           |
| Nathaniel Newlands      | Jakúp Reinert            | Wolfgang Stotz             |
| J. Rasmus Nielsen       | Christian Reiss          | Yorgos Stratoudakis        |
| Jørgen G. Nielsen       | Luke Rendell             | James Sulikowski           |
| Per Nilsson             | Martin Renner            | Patrick Sullivan           |
| David Noakes            | Patrick Ressler          | Rashid Sumaila             |
| Simon Northridge        | Andrew Revill            | Wayne Sumpton              |
| Ron O'Dor               | Christine Ribic          | Chi-Lu Sun                 |
| Richard L. O'Driscoll   | Jake C. Rice             | Glenn Suter                |
| Temel Oguz              | Vincent Ridoux           | Petri Suuronen             |
| Erik Olsen              | Bernhard Riegl           | Sten Sverdrup-Jensen       |
| Kjell Kristian Olsen    | Dominic Rihan            | Sarah Swan                 |
| Egil Ona                | Adriaan D. Rijnsdorp     | Yonat Swimmer              |
| Frode Oppedal           | Etienne Rivot            | Stephen T. Szedlmayer      |
| Jose María Orensanz     | Dominique Robert         | Fabian J. Tapia            |
| Emma L. Orlova          | Marie-Joëlle Rochet      | Mark Tasker                |
| Peter Ortner            | Lynda Rodwell            | Ian Taylor                 |
| Patrick Osborne         | Christine Roeckmann      | Matthew Taylor             |
| Geir Ottersen           | Beatriz A. Roel          | Martin Thiel               |
| Patrick Ouellet         | Marina Roldan            | Ron Thresher               |
| William J. Overholtz    | George Rose              | Victoria L. G. Todd        |
| Dave Packer             | Gabriel Rosón            | Jakob Tougaard             |
| Debra Palka             | Douglas Rotherham        | Jochen Trautner            |
| José Castro Pampillón   | Tristan Alexander Rouyer | Morgane Travers            |
| Christophe Pampoulie    | Lars Rudstam             | Alexandros Triantafyllidis |
| Claire B. Paris         | Heye Rumohr              | Costas Triantaphyllidis    |
| John I. Pariwono        | Keith Sainsbury          | Christofer Troedsson       |
| Roger Parsons           | Antonello Sala           | Oliver Tully               |
| Sean Pascoe             | Joan Saldana             | Bill Turrell               |
| Lynsey Patterson        | Pilar Sanchez            | Evangelos Tzanatos         |
| Mick Pawson             | Gordon Schwartzman       | Sven Sebastian Uhlmann     |
| Dominique Pelletier     | Tore Schweder            | Clara Ulrich-Rescan        |
| Pierre Pepin            | Eduardo Secchi           | Andrés Uriarte             |
| Brian Petrie            | David H. Secor           | Laura Uusitalo             |
| Hildur Petursdottir     | Juan Carlos Seijo        | Vasilis Valavanis          |
| Graham Pierce           | Rochelle Seitz           | Jeroen van der Kooij       |
| James J. Pierson        | Jayson Semmens           | Luc van Hoof               |
| GerJan Piet             | Alberto Serrano          | Tobias van Kooten          |
| Graham M. Pilling       | Jean-Marie Sévigny       | Hans van Oostenbrugge      |
| Eunice Pinn             | Lynne Shannon            | Jules M. van Rooij         |

Paul van Zwieten  
Jeremy Vaudo  
Eva Garcia Vazquez  
Julie Vecchio  
Michael Vecchione  
Bill Venables  
Marieke Verweij  
Maria Villanueva  
Morten Vinther  
Jarno Virtanen  
Filip Volckaert  
Alan Walker  
John F. Walter  
Carl Walters  
Sarah Wanless

Robin S. Waples  
Bruce Ward  
Peter Ward  
Shun Watanabe  
Jonathan L. Watkins  
Gregg Watson  
Reginald W. Watson  
Mason Weinrich  
Michael Weise  
Robert Wells  
Grant West  
John Whitehead  
Fred Whoriskey  
Håkan Wickström  
Jerry D. Wiggert

Michael J. Wilberg  
Tom Wilding  
Alan Williams  
Doug Wilson  
Win Winston  
Anthony Wood  
Christopher Wood  
Peter J. Wright  
Chau-Ron Wu  
Harald Yndestad  
Mary Yoklavich  
Shijie Zhou  
Erika Zollett

doi:10.1093/icesjms/fsp286
